# Supplementary material
Source: PubMed Central journal article supplement (PMC193581)
Supplement: pnas_1832655100_1.pdf [file pnas_1832655100_1.pdf]

**Table 1. Primers used to PCR amplify internal portions of site-specific recombinase genes for use as probes**

| Gene         | Gene size, bp | Forward primer                 | Reverse primer                 | Size amplified, bp |
|--------------|---------------|--------------------------------|--------------------------------|--------------------|
| <i>tsr1</i>  | 624           | GGAGTATCACAAAGGGCGTAACATCGAC   | CAATGGGTAGCGAAAGAGTGACGGAG     | 605                |
| <i>tsr2</i>  | 885           | TTTGCGGGAAGAAACCTCCGCTAC       | GCCTCTTTCAGCTTCTTCGACACGATG    | 527                |
| <i>tsr3</i>  | 1,239         | GCGAGAACCACGACACCATACTTAACC    | CAATGCCGACAAACTTCTTGTCAAGCC    | 900                |
| <i>tsr4</i>  | 1,182         | TGGGATTGTGGCAACAGGGGAAAC       | TTGGTATGGCGAGCGGTATGGAAC       | 781                |
| <i>tsr5</i>  | 1,116         | TAATGACCAGAGAAAGCCGAAAGCCATCC  | CGCATTTCCCACCAGCAGAATAGTCC     | 573                |
| <i>tsr6</i>  | 810           | GCGTTTCAAGAAAGTGATACGCTATGCC   | CTTCAACCCGCTATGTCGAGTAAACC     | 568                |
| <i>tsr7</i>  | 882           | ACAGGACCAGAAAATAAAAAGCCACTTCCC | TGACCCAAAAGCTCTTTCACCGCAC      | 503                |
| <i>tsr8</i>  | 807           | GTCCAAGCGAATATGGCGAAAAATACGG   | ATGTCCCATCAGGTCAGCAAGCAGAG     | 693                |
| <i>tsr9</i>  | 1,296         | CTACATCAAGAGATCCGCAAGTGAGAAACC | TGAGCAAGGGCATAGTGATATCCAGAGG   | 551                |
| <i>tsr10</i> | 918           | ACTAATCGAAAACACATTCTGCCAGCC    | ACGAGTTGCGAAACTATGCCTAAGTCC    | 688                |
| <i>tsr11</i> | 1,233         | AGTCTTATTTTATCTCAAGCGCAATGCCCC | CAACTTACCGTCTTTCGCCATACCCCTC   | 928                |
| <i>tsr12</i> | 1,230         | AGGCAAAGGAAAGGCGGAAAGCAC       | TGCCGATGATTCTGAGGCTGAGGAAC     | 638                |
| <i>tsr13</i> | 1,224         | GCGCATCACCGTAAACAAGCGAGTAG     | GGTAATGCCGCATAAATCAGCGATTTCC   | 946                |
| <i>tsr14</i> | 903           | TTTACGGGCGACCAACAAGGCAC        | CCACGACCGCCAATGACTGATTGATAC    | 659                |
| <i>tsr15</i> | 945           | CGCAATGGTACTGCCCATGTATATCAGAG  | GCTATTCATCCGGTTTACCTCATCGTCTC  | 819                |
| <i>tsr16</i> | 930           | TCCGCGCTGTCTATAACAAAGCCC       | TTGCCTCAGAAGTATGCCCAAGCC       | 585                |
| <i>tsr17</i> | 918           | TGGCAGTCCTTTTTTCGTTTGAGGAGTTG  | AAGCCGCTTAGTGTCTATGCGATCC      | 736                |
| <i>tsr18</i> | 783           | AGATTATTTCTGCCCGTGCCATAGTAAACC | ACTATCCACAAGTTGCCGTTGCTATCC    | 579                |
| <i>tsr19</i> | 921           | ACAGCACAGCCAATACCTACCTCTACAC   | CTTCTTAAATCTCACGGCGCAATCAC     | 849                |
| <i>tsr20</i> | 1,143         | ACCCGAGCATAACCGGACGGATAAAG     | AGATACCGTATAAAGATCGGCACCGAGAG  | 907                |
| <i>tsr21</i> | 852           | ACCGCCGCTGCTTATCAAAGTACC       | AATCCCGCACTGATTGCCGAAACC       | 734                |
| <i>tsr22</i> | 984           | GGAAAGAAAAATCCCCAACGAAGGCAG    | ACGCGCCAATAAACCCTTAGCTC        | 696                |
| <i>tsr23</i> | 723           | CGTATGAGAAGTATGTGACCGTGT       | TCGCTATTGGATGTTGAATGTTAT       | 606                |
| <i>tsr24</i> | 954           | AAACACACTGGAGGCTTACTTGACAGAC   | ACTCATGCCCAACATGCATTGGATAG     | 743                |
| <i>tsr25</i> | 969           | GAGAGTGCAGGAAAAGAGGAGAT        | TGTTTGTCCGATCTACTTCCCTAT       | 796                |
| <i>tsr26</i> | 933           | GACATTCCGTTCAAAGAGTAAGG        | CGTTTGGCATAACCGATAATACTT       | 788                |
| <i>tsr27</i> | 1,164         | AATAAAGAGGGTAATGCTCCCTA        | AATGTCGCTACATCCTTTGTTTTT       | 1,019              |
| <i>tsr28</i> | 588           | AGATATTTCTCGCTCTTACGTGGTC      | ACGTTTCAAGTAATTCCTCTGTCC       | 425                |
| <i>ssr2</i>  | 594           | GCGTGAGCACAAAAGACAGAAAGCTATC   | ATACCCCATCTTCTCCGCAATTCC       | 423                |
| <i>ssr3</i>  | 594           | AGATAATAGGCTACGCTCGTGTTCACCG   | AGCTTTTTCTCTTGCATCTTCCGATAACCC | 449                |
