# Supplementary material
Source: PubMed Central journal article supplement (PMC193581)
Supplement: pnas_1832655100_2.pdf [file pnas_1832655100_2.pdf]

**Table 2. Additional primers used in this study**

| Primer name   | Sequence                       | Purpose                         | 5' addition                 |
|---------------|--------------------------------|---------------------------------|-----------------------------|
| <b>Fig. 1</b> |                                |                                 |                             |
| VarA-F        | TGTGTAATGATAGGAGGCTAGGG        | clone PSA invertible region     | AT CTGCAG ( <i>Pst</i> I)   |
| VarA-R        | AGTTACTTTCGGGTGCC              | clone PSA invertible region     | AT CTGCAG ( <i>Pst</i> I)   |
| C7            | GGGGACATTGTCTCTCTTTC           | plasmid-derived primer          |                             |
| A3            | ACTTTTTTCGACCTTTTCTAAAAATC     | inversion PSA promoter          |                             |
| A4            | ACAAAGGTAAGGCACATTTTTATAAC     | inversion PSA promoter          |                             |
| tsr15-F2      | GAATGATAAGCAAAGCATGCG          | clone <i>tsr15</i>              | AT GGATCC ( <i>Bam</i> HI)  |
| tsr15-R2      | ATATATTTAAATTTGCCGCCGATA       | clone <i>tsr15</i>              | AT GGATCC ( <i>Bam</i> HI)  |
| tsr21-F2      | TTATTTGCAACCCGAAAAGATAAT       | clone <i>tsr21</i>              | TA GGATCC ( <i>Bam</i> HI)  |
| tsr21-R2      | GCGAGAAAGATAGATTGATGAAAA       | clone <i>tsr21</i>              | AA GGATCC ( <i>Bam</i> HI)  |
| tsr24-F2      | AACAATATTTCAAGGTGCAAAGGT       | clone <i>tsr24</i>              | TG GGATCC ( <i>Bam</i> HI)  |
| tsr24-R2      | AAAATATCGTGTTCACGGGTTGT        | clone <i>tsr24</i>              | TG GGATCC ( <i>Bam</i> HI)  |
| ssr2-F2       | CGTATTTGAATGAATAGCCGTTTT       | clone <i>ssr2</i>               | TT GGATCC ( <i>Bam</i> HI)  |
| ssr2-R2       | TGTAATCTGCGGTGAATTATGACT       | clone <i>ssr2</i>               | TC GGATCC ( <i>Bam</i> HI)  |
| <b>Fig. 2</b> |                                |                                 |                             |
| ssr2-D1       | AGTACTGATAACTCCGGTGACTCC       | delete <i>ssr2</i> -right flank | CC GGATCC ( <i>Bam</i> HI)  |
| ssr2-D2       | CCGGTTTATGAAAACGATGTATTA       | delete <i>ssr2</i> -right flank | AT CCATGG ( <i>Nco</i> I)   |
| ssr2-D5       | TTTTCCGTACTTACTCTCAAATAAGC     | delete <i>ssr2</i> -left flank  | CG CCATGG ( <i>Nco</i> I)   |
| ssr2-D6       | ATGACATAGATAATGGGAAGAGG        | delete <i>ssr2</i> -left flank  | GG GGATCC ( <i>Bam</i> HI)  |
| A3            | ACTTTTTTCGACCTTTTCTAAAAATC     | inversion PSA promoter          |                             |
| C473          | AGAAAACCTCTGGTCTCTTTTG         | inversion PSA promoter          |                             |
| A4            | ACAAAGGTAAGGCACATTTTTATAAC     | inversion PSA promoter          |                             |
| B6            | GCGCTCAATACACCGCAATACGAATAAC   | inversion PSB promoter          |                             |
| B2            | ACAGACTCCTTACCTTTGTTCATCAAACG  | inversion PSB promoter          |                             |
| B4            | CCGGAATGCTCTGGCATATTTTTTCAGCTC | inversion PSB promoter          |                             |
| D6            | GTCACCTTTGATACGGACAACTACCCTC   | inversion PSD promoter          |                             |
| D5            | GCACTTATGAAAATACCTCTATCTTTGCG  | inversion PSD promoter          |                             |
| D7            | GTTTTTCCATCTCAGTTTCATGGCTTCAG  | inversion PSD promoter          |                             |
| E1            | GCCTTTTCCGTTGCTTACTG           | inversion PSE promoter          |                             |
| E4            | AGGTATAAACTAAATTTGATGTGCAA     | inversion PSE promoter          |                             |
| E3            | CGTTGAGGATAACAGCAGCA           | inversion PSE promoter          |                             |
| F3            | CCAGTTCAAAGCGGAAGAAG           | inversion PSF promoter          |                             |
| F2            | CAGAAGAGAACGAAAACAAAATCA       | inversion PSF promoter          |                             |
| F1            | CGTTTCATGTAAGCGGATT            | inversion PSF promoter          |                             |
| G3            | ACCGCATAGCGTCAGTCTCT           | inversion PSG promoter          |                             |
| G2            | TCGAAACATAAAGCAGACAGA          | inversion PSG promoter          |                             |
| G1            | TTTGCTTTGTTCGGTTTTG            | inversion PSG promoter          |                             |
| H3            | CGCTCGTTCTTGACGATGTA           | inversion PSH promoter          |                             |
| H2            | TGATGAAATTCAGAACCGGATA         | inversion PSH promoter          |                             |
| H1            | CTTGCCAGTTCCTCGTATGT           | inversion PSH promoter          |                             |
| <b>Fig. 3</b> |                                |                                 |                             |
| VarB-F        | CGCAAAGATTACTTTTCCATTTACTTCG   | clone PSB invertible region     | 5'AT CTGCAG ( <i>Pst</i> I) |
| VarB-R        | TGCGCTTCGCGGTTGAACG            | clone PSB invertible region     | 5'AT CTGCAG ( <i>Pst</i> I) |
| VarD-F        | TGGAGAGTAATCTTTCAGTGGG         | clone PSD invertible region     | 5'AT CTGCAG ( <i>Pst</i> I) |
| VarD-R        | CAGCGTATATCATTTTCATCAGG        | clone PSD invertible region     | 5'AT CTGCAG ( <i>Pst</i> I) |
| VarE-F        | CAATGTGACAGAATGCTTTTGGG        | clone PSE invertible region     | 5'AT CTGCAG ( <i>Pst</i> I) |
| VarE-R        | ACTTAAGTCCGGGTATGCTTCG         | clone PSE invertible region     | 5'AT CTGCAG ( <i>Pst</i> I) |
| VarF-F        | TAGAAAGGAATCTATCGGTAGGC        | clone PSF invertible region     | 5'AT CTGCAG ( <i>Pst</i> I) |
| VarF-R        | TAGCGAAGCATACTCCCGG            | clone PSF invertible region     | 5'AT CTGCAG ( <i>Pst</i> I) |
| VarG-F        | TATAAAATGTTGCAAAGGTATGAACG     | clone PSG invertible region     | 5'AT CTGCAG ( <i>Pst</i> I) |
| VarG-R        | TACACTTGAAATTCATCACTTGCG       | clone PSG invertible region     | 5'AT CTGCAG ( <i>Pst</i> I) |
| VarH-F        | ATTATGCGCATAGGCGTACG           | clone PSH invertible region     | 5'AT CTGCAG ( <i>Pst</i> I) |
| VarH-R        | ATGCTGAAATGTTATGTGACCGCC       | clone PSH invertible region     | 5'AT CTGCAG ( <i>Pst</i> I) |
| C7            | GGGGACATTGTCTCTCTTTC           | plasmid-derived primer          |                             |
| B2            | ACAGACTCCTTACCTTTGTTCATCAAACG  | inversion PSB promoter          |                             |
| B4            | CCGGAATGCTCTGGCATATTTTTTCAGCTC | inversion PSB promoter          |                             |
| D2            | TTTTTTAAAGATCCAGACAATTA        | inversion PSD promoter          |                             |
| D4            | TTAATTGAACGCAAAGATAGG          | inversion PSD promoter          |                             |
| E2            | TGGAGATAAAAGACCACATACAAAA      | inversion PSE promoter          |                             |
| E4            | AGGTATAAACTAAATTTGATGTGCAA     | inversion PSE promoter          |                             |
| F2            | CAGAAGAGAACGAAAACAAAATCA       | inversion PSF promoter          |                             |
| F4            | GCAAAGATAGGGGTATTTTTAGA        | inversion PSF promoter          |                             |
| G2            | TCGAAACATAAAGCAGACAGA          | inversion PSG promoter          |                             |
| G4            | GATAAGGGGTATTTTCATAATAGCAA     | inversion PSG promoter          |                             |
| H2            | TGATGAAATTCAGAACCGGATA         | inversion PSH promoter          |                             |

|                           |                             |                          |                             |
|---------------------------|-----------------------------|--------------------------|-----------------------------|
| H4                        | TCATTTTTGATGAAATTCAGAACC    | inversion PSH promoter   |                             |
| <b>Fig. 4</b>             |                             |                          |                             |
| MCR1-1                    | TGTATCCGGAGGAATGTGTTATAC    | inversion MCR1           |                             |
| MCR1-2                    | CGAGTGATTTATACGAAAAAGGA     | inversion MCR1           |                             |
| MCR1-3                    | CAACCTATAATTTCCGGAGTAGG     | inversion MCR1           |                             |
| MCR2-1                    | GGTATTAATGAGTAGCCACCAC      | inversion MCR2           |                             |
| MCR2-2                    | CTGTGCGAGAATAAAGATTGTGT     | inversion MCR2           |                             |
| MCR2-3                    | AGCAGTATATTTTGAAGCGTAGG     | inversion MCR2           |                             |
| MCR3a-1                   | GTGCTACAGGCTATCCGAGACTAT    | inversion MCR3a          |                             |
| MCR3a-2                   | TGTACAAAATGCAAAGGGAATAGA    | inversion MCR3a          |                             |
| MCR3a-3                   | TTAGGGTGAAGGAGTATTTTCTG     | inversion MCR3a          |                             |
| MCR3b-1                   | GAAGGTAAAACCGATGTCAATAGC    | inversion MCR3b          |                             |
| MCR3b-2                   | GGGAGCCGATAAACTTCTGATAAT    | inversion MCR3b          |                             |
| MCR3b-3                   | TACGTAATGCTGCCTACTTTACG     | inversion MCR3b          |                             |
| MCR4a-1                   | CACTCATGTAGTTCACCATTTTGG    | inversion MCR4a          |                             |
| MCR4a-2                   | CTGAAGGCCAAAGGAAGATATAAA    | inversion MCR4a          |                             |
| MCR4a-3                   | CCTGCCGTACTATTGAACGAGTAT    | inversion MCR4a          |                             |
| MCR4b-1                   | CTACTAGTGATGGGGGTACAGGAG    | inversion MCR4b          |                             |
| MCR4b-2                   | AACATCATTTTTACTCTCCGCACT    | inversion MCR4b          |                             |
| MCR4b-3                   | AGCCGACTGGAAGACATAGTTATT    | inversion MCR4b          |                             |
| <b>Additional primers</b> |                             |                          |                             |
| MCR1-prom1                | GACGTACGTTTAAAAACACATCAA    | promoter analysis MCR1   | AA GGATCC ( <i>Bam</i> HI)  |
| MCR1-prom2                | AACGTACGTTTATTTGTTTACACA    | promoter analysis MCR1   | AC GGATCC ( <i>Bam</i> HI)  |
| A9                        | AACTAGATGGAAGAAAAGGGAGGGGTG | PCR-digestion PSA region | GTGG GGATCC( <i>Bam</i> HI) |
