# Supplementary material
Source: PubMed Central journal article supplement (PMC193581)
Supplement: pnas_1832655100_9.pdf [file pnas_1832655100_9.pdf]

A.

Mcr2 1 ~~~MNRTHIMR.ECLSKALWLCFCLSTTCQAEEDRRMTPLSADSGDPTADELIPIHISHTGDNVHS.SSFNDASTRSHSPLLAEWVGVKRFSPTRT.GEOPFIEGPRIASMELETETLPRVSTRATVPAGVYFRLLI  
Mcr3a 1 ~~~MNKLLIMRTHLLNIGVMTASSLWLEOQEBEKY.PPEPEKGDHSGTVIPKISMAEKGVDSTPENDINGMAPRINAPLIAEWAQVOTLSRTRT.KESPEYIEGPRIASMELETETETSTLTRANLSTGVYFRLLI  
Mcr3b 1 MNTKTKLLYVGFRAIATCCLYAAFLMITSCE.DNVVNPDSPEP..DGEDMTPVITISRVEDGNY.MESHVDTPTTTGGRTLVDEWVEVKEPPASRVIPAAVVEGPPAVRMLREB..POVTRASTLGNDFYFRLLI  
Mcr4a 1 MNTKTKLLYVGFRAIATCCLYAAFLMITSCE.DNVVNPDSPEP..DGEDMTPVITISRVEDGNY.MESHVDTPTTTGGRTLVDEWVEVKEPPASRAIPAAVVEGPPAVRMLREB..POVTRASTLGNDFYFRLLI  
Mcr4b 1 ~~~MNRTHIMR.ECLSKALWLCFCLSTTCQAEEDRRMTPLSADSGDPTADELIPIHISHTGDNVHS.SSFNDASTRSHSPLLAEWVGVKRFSPTRT.GEOPFIEGPRIASMELETETLPRVSTRATVPAGVYFRLLI

130 VFRKSGNNYVFOQSAADYASNGTCTPVLKCKLLTRSGTIRVVGYSFNNTADLGDMPSTYVYNSSTVSTPDMKDFMTDSDGDIINVNSLSHN.LPVSEFOKLCCKLTIISPTGFSNTITNCTGVYVQGGNSTSWIGPSTN  
132 VFRKSGNNYVFOQSAADYASNGTCTPVLKCKLLTRSGTIRVVGYSFNNTAALGTPESYTYNTPKIDIPNMNDPMTYDSDGDIANVNSLNYN.LPVSEFOKLCCKLTIISPTGFSNTITNCTGVYVQGGNSTSWIGPSTN  
131 AFRKSGNNYVFOQSAADYASNGTCTPVLKCKLLTRSGTIRVVGYSFNNTAALGTPESYTYNTPKIDIPNMNDPMTYDSDGDIANVNSLNYN.LPVSEFOKLCCKLTIISPTGFSNTITNCTGVYVQGGNSTSWIGPSTN  
131 AFRKSGNNYVFOQSAADYASNGTCTPVLKCKLLTRSGTIRVVGYSFNNTAALGTPESYTYNTPKIDIPNMNDPMTYDSDGDIANVNSLNYN.LPVSEFOKLCCKLTIISPTGFSNTITNCTGVYVQGGNSTSWIGPSTN  
130 VFRKSGNNYVFOQSAADYASNGTCTPVLKCKLLTRSGTIRVVGYSFNNTADLGTIPESYTYNTPKIDIPNMNDPMTYDSDGDIINVNSLSHN.LPVSEFOKLCCKLTIISPTGFSNTITNCTGVYVQGGNSTSWIGPSTN

272 VVAANTNTAARFSEPTTLNFTIRMVFPAGARTITVHFNTLTVGGRTVNN..NFEITSTQSVOLKEGKSYTKIQFKGEGINVPASNNLTL..QNGCTENDKTIISKLRWABGNLNSQS.NVNLWASSITDYGYYIWKNVY  
272 AVAANTNTAARFSEPTTLNFTIRMVFPAGARTITVHFNTLTVGGRTVNN..NFEITSTQSVOLKEGKSYTKIQFKGEGINVPASNNLTL..QNGCTENDKTIISKLRWABGNLNSQS.NVNLWASSITDYGYYIWKNVY  
273 NVSANTNTAARFSEPTTLNFTIRMVFPAGARTITVHFNTLTVGGRTVNN..NFEITSTQSVOLKEGKSYTKIQFKGEGINVPASNNLTL..QNGCTENDKTIISKLRWABGNLNSQS.NVNLWASSITDYGYYIWKNVY  
273 NVSANTNTAARFSEPTTLNFTIRMVFPAGARTITVHFNTLTVGGRTVNN..NFEITSTQSVOLKEGKSYTKIQFKGEGINVPASNNLTL..QNGCTENDKTIISKLRWABGNLNSQS.NVNLWASSITDYGYYIWKNVY  
273 VVAANTNTAARFSEPTTLNFTIRMVFPAGARTITVHFNTLTVGGRTVNN..NFEITSTQSVOLKEGKSYTKIQFKGEGINVPASNNLTL..QNGCTENDKTIISKLRWABGNLNSQS.NVNLWASSITDYGYYIWKNVY

410 VSSGTYGYGAVDPCRTLESEIYGSQWRTPTRSEFFISLSRCSNKQIVKYNGHCGMWFMSHGLFLPAGCVRDGDGKSETTATAYTNGGSGYYSDDLNGNS.AYGLYILKNDVFDANG.N...RKSQSVRCVHNL~ 541  
414 ..NG...NNHDPCARLNPITYGSGWRTPTRNELELRCNNVKKVS.NGVNGVWFNATTCGLFLPAGGGRN..NNSSTTAEDDWGTYGQYFTIDESINTDC.YRLDISFEGKTDVNSTP...KKMAYQTRCVKPKL 539  
409 ..NG...STGDCPKLNTAYYGTGWRTPTRNELELRCNTRK..VFTNN..GMWFMSHGLFLPAGGGRQESGSGTNGATYDHC...YVWSTLGTSKNAYNMBEWNTEAHVNNNTSSWFGLQTNGLLRCVKSTKQ 534  
408 ..TGKNTNNNDPCSKLNTAYYGTGWRTPTRNELELRCNTRK..VFTNN..GMWFMSHGLFLPAGGGRQESGSGTNGATYDHC...YVWSTLGTSKNAYNMBEWNTEAHVNNNTSSWFGLQTNGLLRCVKSTKQ 534  
410 ...TCNTSINNDDPCPKL.KSDYGTGWRTPTRNELELRCNTRKAVVVTNGCNGCWFMSHGLFLPAGGGRQESGSGTNGATYDHC...YVWSTLGTSKNAYNMBEWNTEAHVNNNTSSWFGLQTNGLLRCVKSTKQ 534

B.

Mcr2c 1 MKTELKGLADNTVTTDNKEDKILVLESAGNLTLSDVLDKMKEDTGLRAETLKHAVDLFQRTVSELVNGYSVNTGLFRAVQFRGVIDGGVWNPFRNSIYVSFNQDKDLREAIARTGVKILGAKGDSAYFIGGE  
Mcr3c 1 MKTELKGLADNTVTTDNKEDKILVLESAGNLTLSDVLDKMKEDTGLRAETLKHAVDLFQRTVSELVNGYSVNTGLFRAVQFRGVIDGGVWNPFRNSIYVSFNQDKDLREAIARTGVKILGAKGDSAYFIGGE

137 DAATRAATDGSATAGRNYRLQGNKIKVAGTDSAVGIVLIDEKGTETKLFMDMIAVNPNSEVLVLLPADLKDGVYELRLTTCSTGNKLLKVPRTVIRSIIVIGLFSGGDGDIVDDPTA 252  
137 DAATRAATDGSATAGRNYRLQGNKIKVAGTDSAVGIVLIDEKGTETKLFMDMIAVNPNSEVLVLLPADLKDGVYELRLTTCSTGNKLLKVPRTVIRSIIVIGLFSGGDGDIVDDPTA 252
