# Supplementary material
Source: PubMed Central journal article supplement (PMC193581)

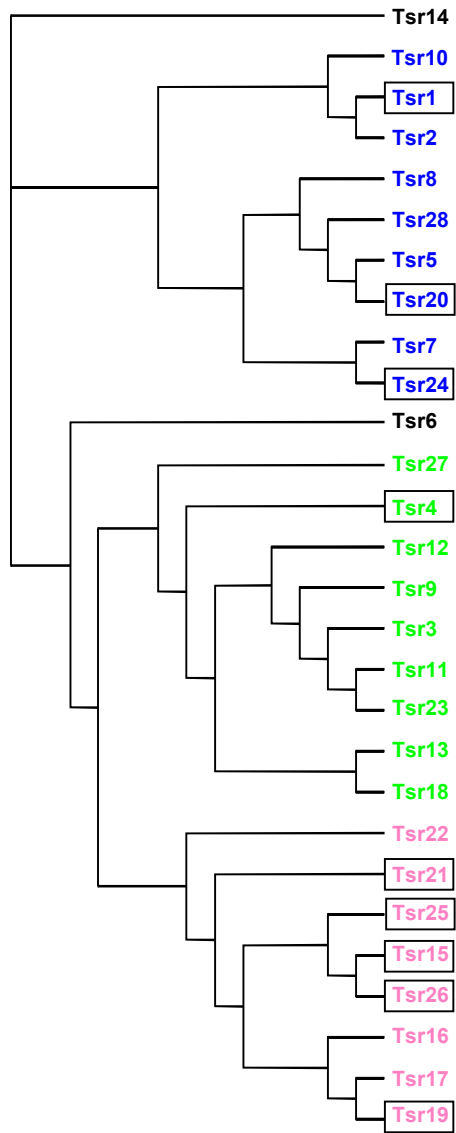

Supplement: pnas_1832655100_4.pdf [file pnas_1832655100_4.pdf]

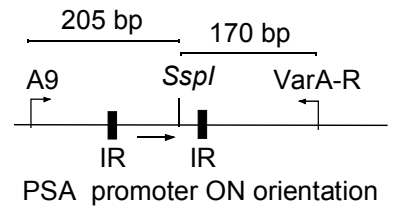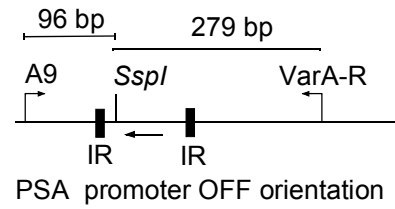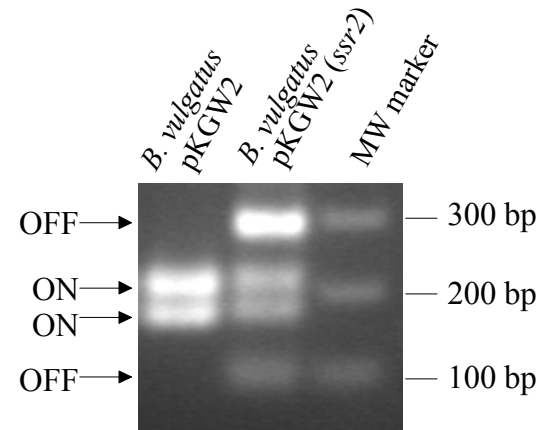

Supplement: pnas_1832655100_6.pdf [file pnas_1832655100_6.pdf]
